# Supplementary material for: Alleviation of Cognitive and Physical Fatigue with Enzymatic Porcine Placenta Hydrolysate Intake through Reducing Oxidative Stress and Inflammation in Intensely Exercised Rats
Source: MDPI journal article supplement (doi:10.3390/biology11121739), 2022-11-29
Supplement: s1 [file s1]

Table S1. Primer sequences for the genes

|                | Forward               | Reverse                   |
|----------------|-----------------------|---------------------------|
| TNF- $\alpha$  | ACCCCCAACCTATGAAGAAA  | TCCACGCAAAACGGAATGAA      |
| IL-1 $\beta$   | TTGTGGCTGTGGAGAAGCTG  | GCCGTCTTTCATACACAGG       |
| BDNF           | ATGCCGAACCTACCCAATCGT | GCCAATTCTCTTTTGCTATCCA    |
| $\beta$ -actin | AGCGTGGCTACAGCTTCACC  | AAGTCTAGGGCAACATAGCAC AGC |
